2. Goodman LS, Gilman A (editors): The Pharmacological Basis of Therapeutics. New York, MacMillan, 1975, pp 25-28
3. Ariens EJ: Molecular Pharmacology. New York, Academic Press, 1964, pp 136-148
4. Thomas ET: The relative potencies of methohexitone and thiopentone. A statistical study in man. *Anaesthesia* 22:16-22, 1967
5. Saidman LJ, Eger EI II, Munson ES, et al: Minimum alveolar

concentrations of methoxyflurane, halothane, ether and cyclopropane in man: Correlation with theories of anesthesia. *ANESTHESIOLOGY* 28:994-1002, 1967

6. Stella L, Torri G, Castiglioni CL: The relative potencies of thiopentone, ketamine, propanidid, alphaxalone and diazepam. A statistical study in man. *Br J Anaesth* 51:119-122, 1979

(Accepted for publication April 29, 1980.)

Anesthesiology  
53:353, 1980

## A Departmental Logo for Anesthesiologists

*To the Editor:*—Recently our Anesthesiology Section had the opportunity to develop a new departmental logo for use on white coats and jackets. Rejecting any abstract depiction of the lungs or the traditional draped Greek maiden, ever watchful while holding the torch of knowledge, the department adopted a logo that was more in keeping with the "soft technology" of the new decade (fig. 1).

Seeing this emblem on a white coat leaves little question as to the specialty of the wearer, and it serves to soften or humanize the image of our hospital-based, technology-dependent specialty; this is especially so with children, who associate "counting sheep" with tranquil sleep. The design is available to members of the anesthesia community; anyone wishing to copy or utilize this design for noncommercial purposes may freely do so. Color photographs and additional information are available upon written request.

THOMAS E. MACNAMARA, M.B., CH.B.  
DAVID ERIC LEES, M.D.  
*Anesthesiology Section*  
3 D 42 Clinical Center  
National Institutes of Health  
Bethesda, Maryland 20205

(Accepted for publication April 29, 1980.)

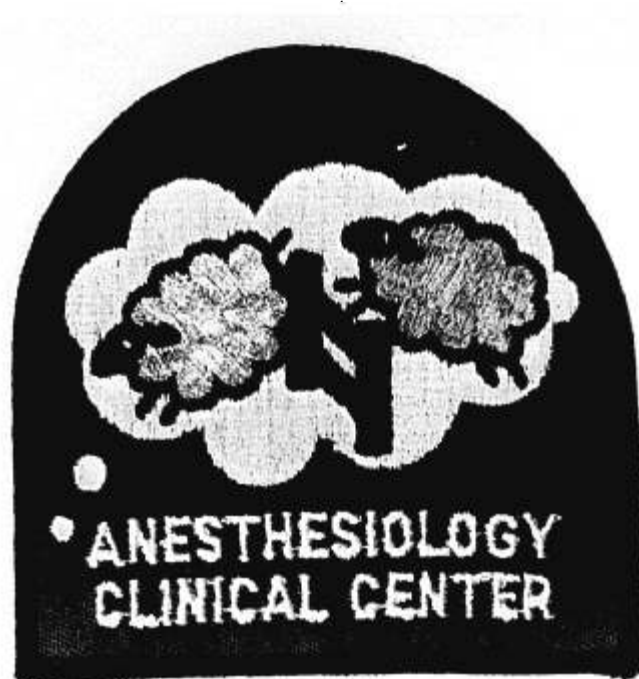

FIG. 1. Departmental logo.

Anesthesiology  
53:353-354, 1980

## Unilateral Analgesia Following Epidural and Subarachnoid Block

*To the Editor:*—Bozeman and Chandra<sup>1</sup> report unilateral analgesia in a parturient for cesarean section following both epidural and subarachnoid injection of local anesthetic. Unilateral analgesia extending from the L2 to T8 dermatomes on the nondependent side was present 40 minutes after an epidural injection of 19 ml of 0.75 per cent bupivacaine administered at L2-3 with the patient in the lateral position. Following

a subarachnoid injection of 10 mg of tetracaine with the patient in the sitting position, the unilateral sensory loss extended from T6 to the entire lower limb.

There are three phenomena to be explained in this case report. First, an unusually large amount of local anesthetic for injection at the L2-3 interspace gave sensory loss to T8 only. Although the height and
